# Supplementary material for: Atlantic Salmon Gill Epithelial Cell Line (ASG-10) as a Suitable Model for Xenobiotic Biotransformation
Source: MDPI journal article supplement (doi:10.3390/metabo13060771), 2023-06-20
Supplement: s1 [file s1]

# Atlantic Salmon Gill Epithelial Cell Line (ASG-10) as a Suitable Model for Xenobiotic Biotransformation Lada Ivanova <sup>1\*</sup>, Christiane Kruse Fæste <sup>1</sup> and Anita Solhaug <sup>1</sup>

**Supplementary Table S1.** Performance parameters of the LC–TQMS method applied for the semi-quantitative analysis of respective metabolites of several CYP and UGT probe substrates in liver microsomes from Atlantic salmon.

|                                            | ACP     | 6-OH-CH | 4-OH-TB | DOR     | 4-OH-MDZ | NLX-GlcA | E2-GlcA | NAS-GlcA | TFP-GlcA | MA-GlcA |
|--------------------------------------------|---------|---------|---------|---------|----------|----------|---------|----------|----------|---------|
| Linear range [ng/ml]*                      | 7.5–321 | 7.5–300 | 7.5–300 | 7.5–300 | 7.5–300  | 6.3–250  | 6.3–250 | 6.3–250  | 6.3–250  | 6.3–250 |
| Correlation coefficient [R <sup>2</sup> ]* | 0.999   | 0.9998  | 0.9997  | 1.0000  | 0.9999   | 0.9927   | 0.9986  | 0.9935   | 0.9937   | 0.9986  |
| LOD* [ng/ml]                               | 9.9     | 4.0     | 4.9     | 1.4     | 2.4      | 18.6     | 8.2     | 17.6     | 17.4     | 8.1     |
| LOQ* [ng/ml]                               | 33      | 13      | 16      | 4.6     | 8.0      | 62       | 27      | 59       | 58       | 27      |
| SSE%                                       | 75      | 50      | 122     | 92      | 136      | 203      | 100     | 130      | 129      | 92      |
| RSD [%]*                                   | <LOD    | 37      | <LOD    | 43      | 18       | 12       | 11      | 56       | <LOD     | 17      |

\*The matrix-assisted calibration standards were used as the basis for this analysis, with 2 to 4 independent experiments conducted; \*the metabolites produced were detected in 60 min-incubation mixtures at levels above the limit of detection (LOD), with 5 or 6 replicates utilized.

**Supplementary Table S2.** Performance parameters of the LC–TQMS method applied for the semi-quantitative analysis of respective metabolites of several CYP and UGT probe substrates in ASG-10 cells from Atlantic salmon.

|                                            | ACP     | 6-OH-CH | 4-OH-TB | DOR     | 4-OH-MDZ | NLX-GlcA | E2-GlcA | NAS-GlcA | TFP-GlcA | MA-GlcA |
|--------------------------------------------|---------|---------|---------|---------|----------|----------|---------|----------|----------|---------|
| Linear range [ng/ml]*                      | 7.5–321 | 7.5–300 | 7.5–300 | 7.5–300 | 7.5–300  | 6.3–250  | 6.3–250 | 6.3–250  | 6.3–250  | 6.3–250 |
| Calibration coefficient [R <sup>2</sup> ]* | 0.9985  | 0.9993  | 0.9999  | 0.9999  | 0.9985   | 0.9998   | 0.9995  | 0.9999   | 0.9992   | 0.9991  |
| LOD* [ng/ml]                               | 11.0    | 6.8     | 3.1     | 2.1     | 10.5     | 3.0      | 4.6     | 2.6      | 6.0      | 6.5     |
| LOQ* [ng/ml]                               | 37      | 23      | 10      | 6.9     | 34.9     | 10       | 15      | 9        | 20       | 22      |
| SSE%                                       | 63      | 42      | 98      | 96      | 91       | 105      | 88      | 102      | 128      | 102     |
| RSD [%] <sup>†</sup>                       | 43–71   | <LOD    | <LOD    | 1–3     | 5–10     | <LOD     | 21–30   | 7–11     | <LOD     | 22–29   |

\*The matrix-assisted calibration standards were used as the basis for this analysis, with 3 independent experiments conducted;

<sup>†</sup>Metabolites were identified following 24 hours of incubation with varying concentrations of CYP and UGT substrates (2 µM, 5 µM, and 10 µM) at levels above the limit of detection (LOD). For each concentration, three replicates were utilized... <sup>†</sup>Data are presented as a range min–max.

## Supplementary Figures

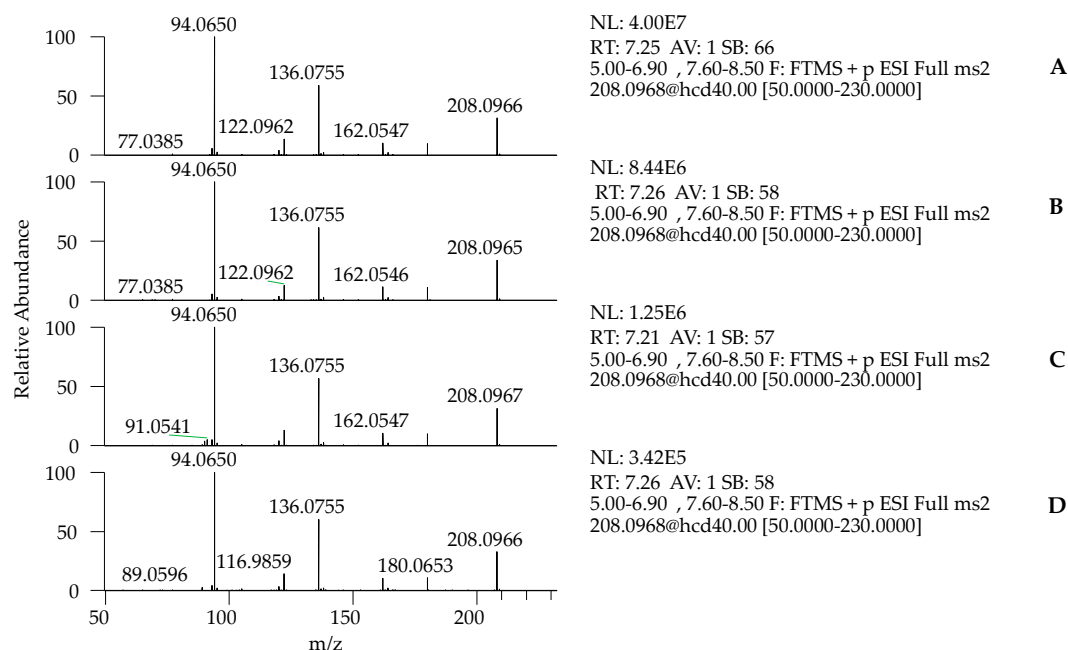

**Figure S1.** Positive ion LC-HRMS/MS spectra of acetylbenzocaine (AcBZ,  $[M+H]^+$ ; theoretical mass  $m/z$  208.0968) in (A) reference standard, (B) salmon plasma, (C) incubation medium of ASG-10 cells after 24 h exposure to 303  $\mu M$  benzocaine (BZ), and (D) S9 incubation aliquot (4 mg/ml protein, 1  $\mu M$  BZ, 1 h).

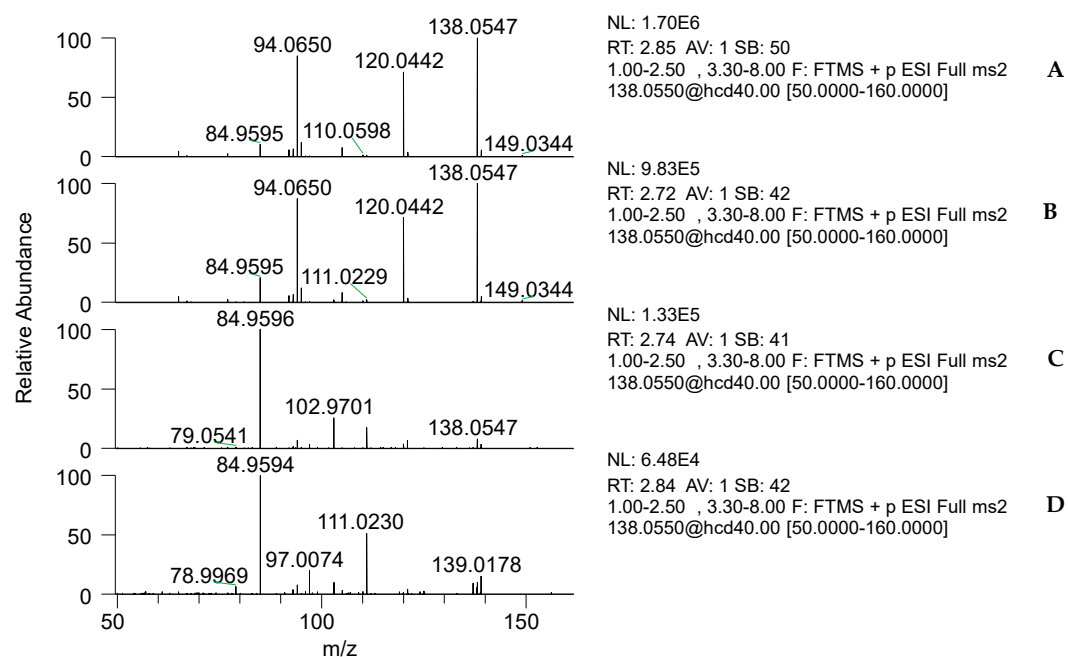

**Figure S2.** Positive ion LC-HRMS/MS spectra of p-aminobenzoic acid (PABA,  $[M+H]^+$ ; theoretical mass  $m/z$  138.0550) in (A) reference standard, (B) salmon plasma, (C) incubation medium of ASG-10 cells after 24 h exposure to 303  $\mu M$  benzocaine (BZ) (C), and (D) S9 incubation aliquot (4 mg/ml protein, 1  $\mu M$  BZ; 1h).

RT: 6.03 AV:1 SB: 50 6.40-8.00 NL:1.70E5  
 F: FTMS + p ESI Full ms2 182.0812@hcd40.00 [50.0000-205.0000]

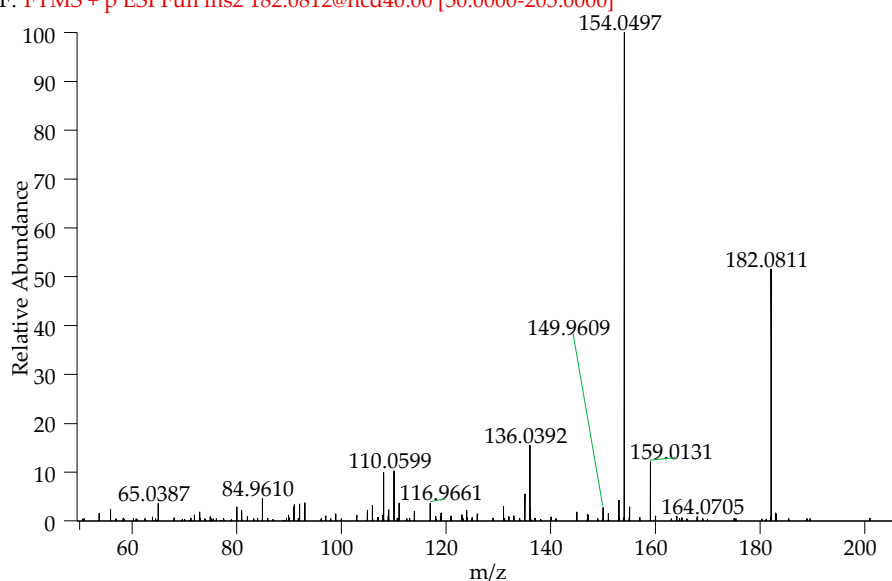

**Figure S3.** Positive ion LC-HRMS/MS spectra of benzocaine hydroxylamine (BZO,  $[M+H]^+$ , theoretical mass  $m/z$  182.0812) detected in incubation medium of ASG-10 cells after 24 h exposure to 303  $\mu$ M benzocaine (BZ).

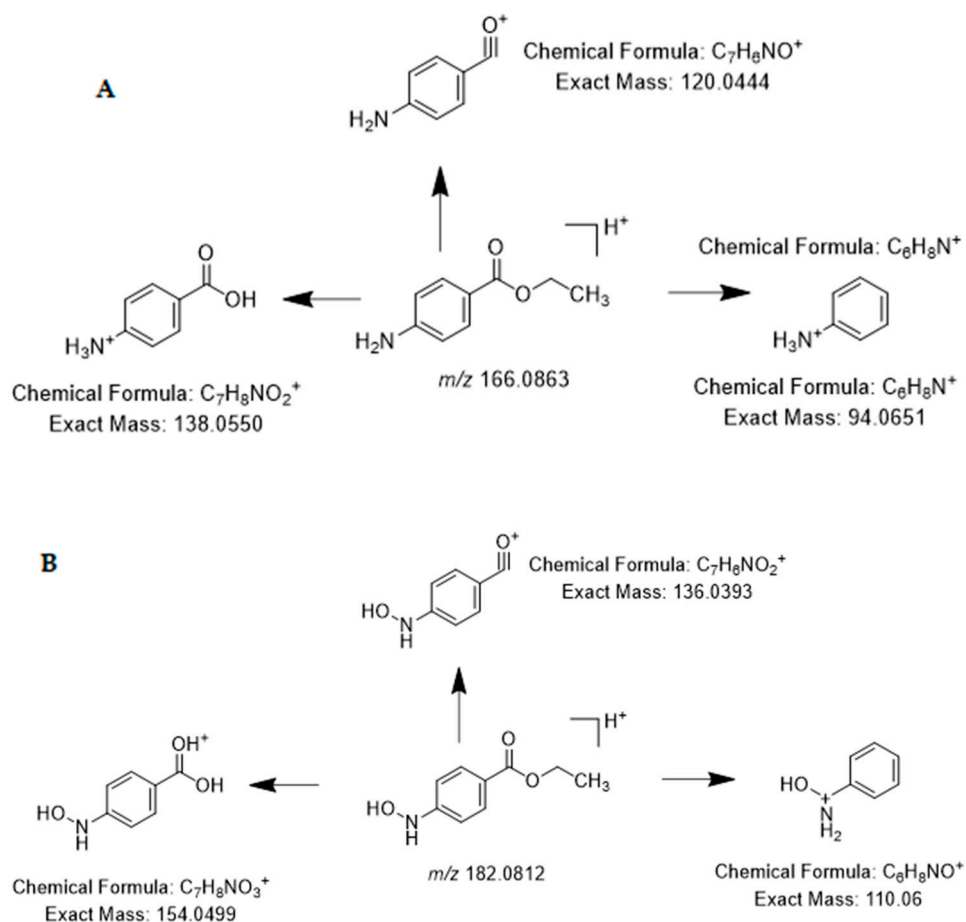

**Figure S4.** Tentative fragmentation patterns of **A)** BZ and **B)** BZO in LC-HRMS/MS. BZ: benzocaine; BZO: benzocaine hydroxylamine.

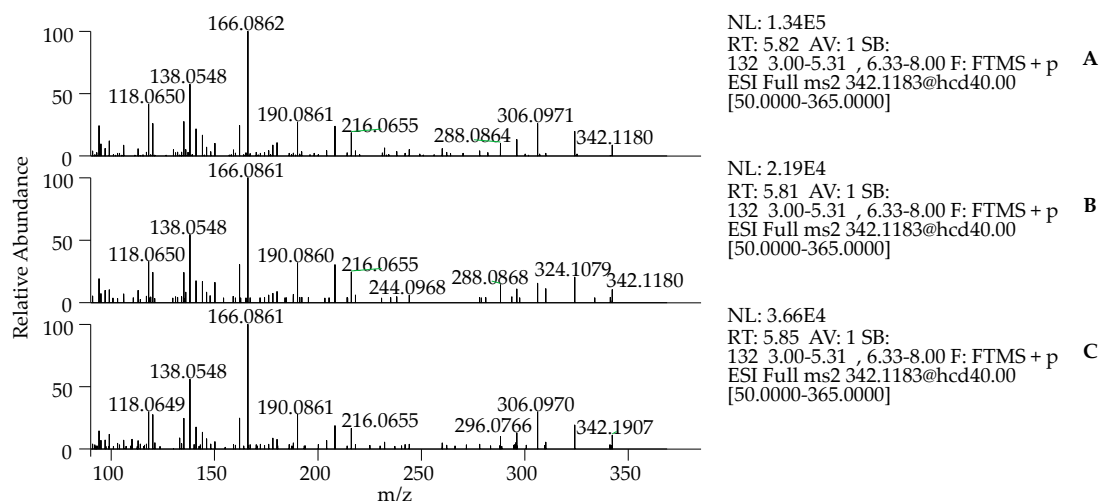

**Figure S5.** Positive ion LC-HRMS/MS spectra of benzocaine glucuronide (BZGlcA,  $[M+H]^+$ ; theoretical mass  $m/z$  342.1183) in (A) salmon plasma, (B) incubation medium of ASG-10 cells after 24 h exposure to 303  $\mu$ M benzocaine (BZ), and (C) S9 incubation aliquot (4 mg/mL protein, 1  $\mu$ M BZ; 1h). The ions at  $m/z$  166.0861 and  $m/z$  166.0862 ( $C_9H_{12}O_2N$ ,  $\Delta < 1$  ppm) were formed by neutral loss of 176 Da ( $C_6H_8O_6$ ,  $\Delta < 2$  ppm), which is a characteristic feature of a glucuronide.

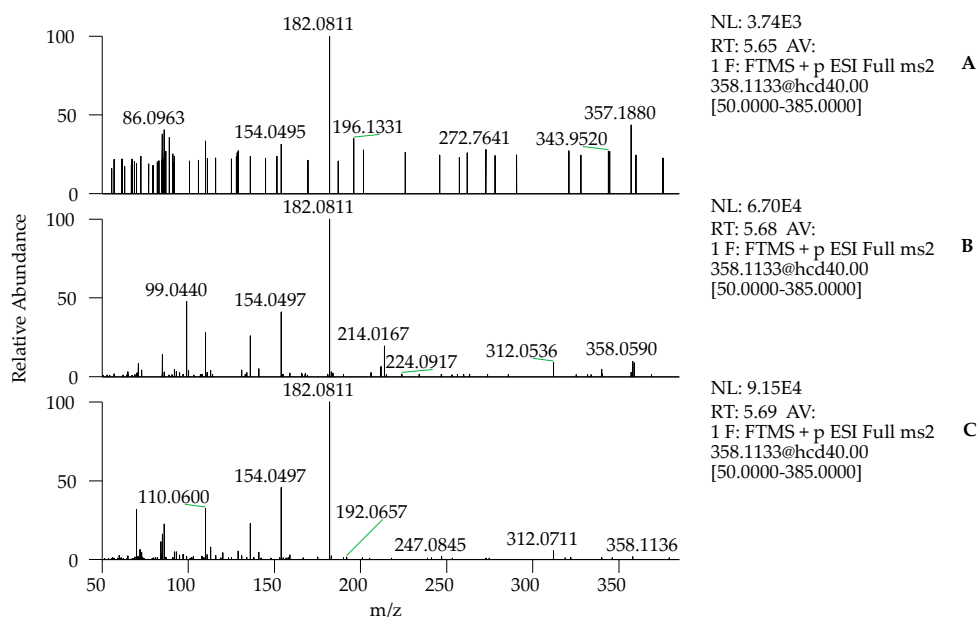

**Figure S6.** Positive ion LC-HRMS/MS spectra of benzocaine hydroxylamine glucuronide (BZ(O)GlcA,  $[M+H]^+$ ; theoretical mass  $m/z$  358.1133) in (A) salmon plasma, (B) incubation medium of ASG-10 cells after 24 h exposure to 303  $\mu$ M benzocaine (BZ), and (C) S9 incubation aliquot (4 mg/mL protein, 1  $\mu$ M BZ; 1h). The ions at  $m/z$  182.0811 ( $C_9H_{12}O_3N$ ,  $\Delta < 1$  ppm) were generated through the neutral loss of 176 Da ( $C_6H_8O_6$ ,  $\Delta = 2.2$  ppm), which is a characteristic feature of a glucuronide.
